# Supplementary material for: Fabrication of hybrid magnetic HKUST-1 and its highly efficient adsorption performance for Congo red dye
Source: Royal Society of Chemistry journal article supplement (doi:10.1039/c5ra00384a), 2015-01-01
Supplement: c5ra00384a1.pdf [file c5ra00384a1.pdf]

## Supporting Information

### **Fabrication of hybrid magnetic HKUST-1 and its high efficient adsorption performance for Congo red dye**

**Yan Xu,<sup>a</sup> Jingjie Jin,<sup>a</sup> Xianliang Li,<sup>b</sup> Yide Han,<sup>a</sup> Hao Meng,<sup>a</sup> Tianyu Wang,<sup>a</sup> Xia Zhang<sup>\*a</sup>**

*<sup>a</sup>Department of Chemistry, College of Science, Northeastern University, Shenyang, Liaoning 110819, China.*

*<sup>b</sup>College of Materials Science and Engineering, Shenyang University of Chemical Technology, Shenyang, Liaoning 110142, China.*

#### **Corresponding Author:**

Prof. Xia Zhang

E-mail: xzhang@mail.neu.edu.cn (X. Zhang)

Fax: +86-024-83684533

Tel.: +86-024-83684533

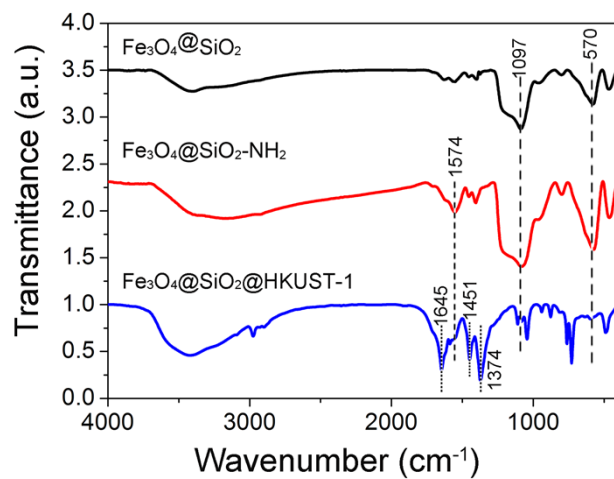

Figure S1. FTIR spectra of  $\text{Fe}_3\text{O}_4@\text{SiO}_2\text{-NH}_2$ ,  $\text{Fe}_3\text{O}_4@\text{SiO}_2\text{-NH}_2$ , and  $\text{Fe}_3\text{O}_4@\text{SiO}_2@\text{HKUST-1}$ .

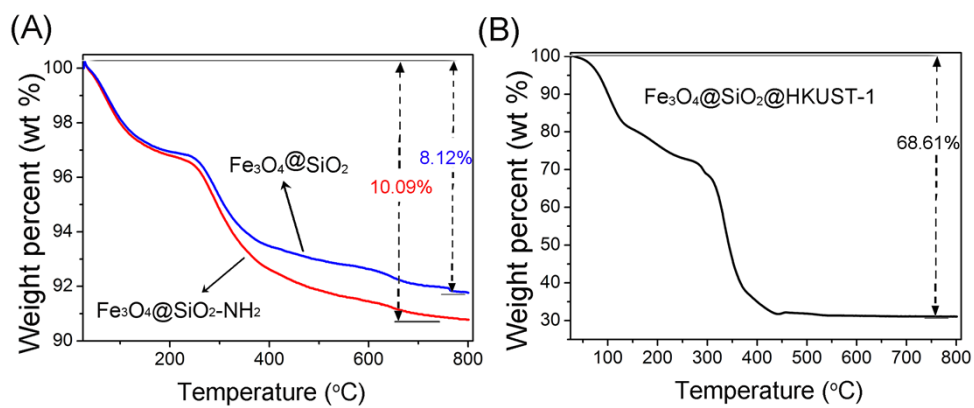

Figure S2 TG curves of (A)  $\text{Fe}_3\text{O}_4@\text{SiO}_2$ ,  $\text{Fe}_3\text{O}_4@\text{SiO}_2\text{-NH}_2$  and (B)  $\text{Fe}_3\text{O}_4@\text{SiO}_2@\text{HKUST-1}$ .

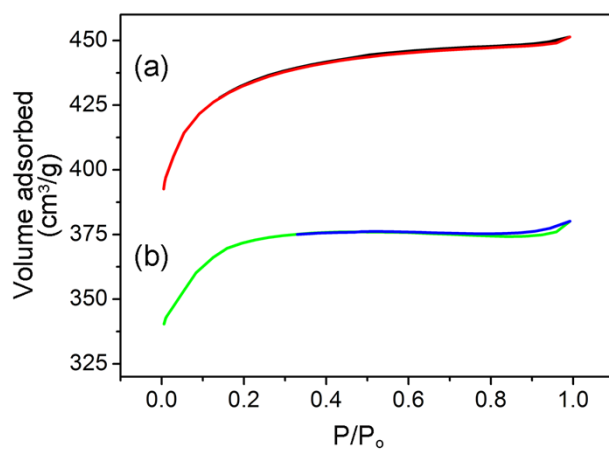

Figure S3. Nitrogen adsorption-desorption isotherm of (a) HKUST-1 and (b) Fe<sub>3</sub>O<sub>4</sub>@SiO<sub>2</sub>@HKUST-1.

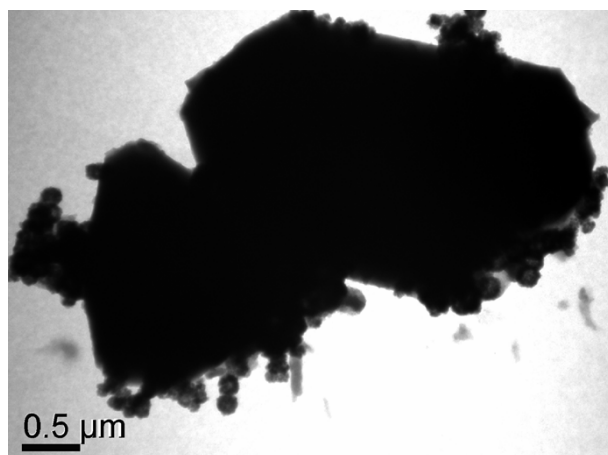

Figure S4. TEM image of Fe<sub>3</sub>O<sub>4</sub>@SiO<sub>2</sub>@HKUST-1.

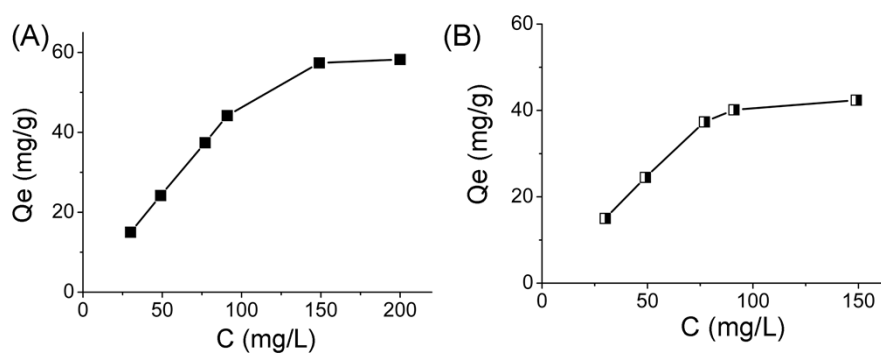

Figure S5. (A) Adsorption isotherms of pure HKUST-1 and (B) amino functionalized  $Fe_3O_4@SiO_2$  for various concentration of Congo red.

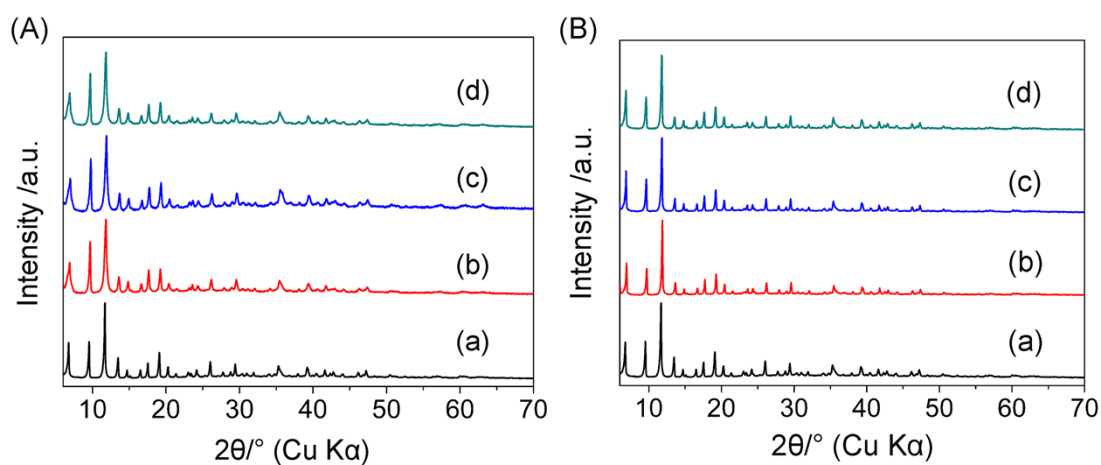

Figure S6. XRD patterns of (a) as-prepared hybrid magnetic HKUST-1 dispersed in pure solvent without Congo red and stirred for (b) 30 min; (c) 60 min and (d) 90 min. Solvent: (A) water; (B) ethanol.

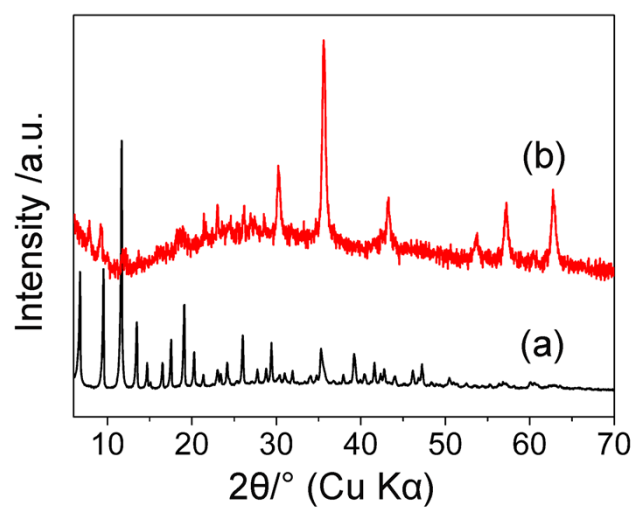

Figure S7. XRD patterns of as-prepared hybrid magnetic HKUST-1 (a) before and (b) after six times sorption and desorption circulatory experiments.
